# Supplementary material
Source: Springer Nature journal article supplement (https://www.springermedizin.de/resource/supplementary/12893_2014_515_MOESM6_ESM.pdf/9512620)

# Any complication (pancreaticoduodenectomy)

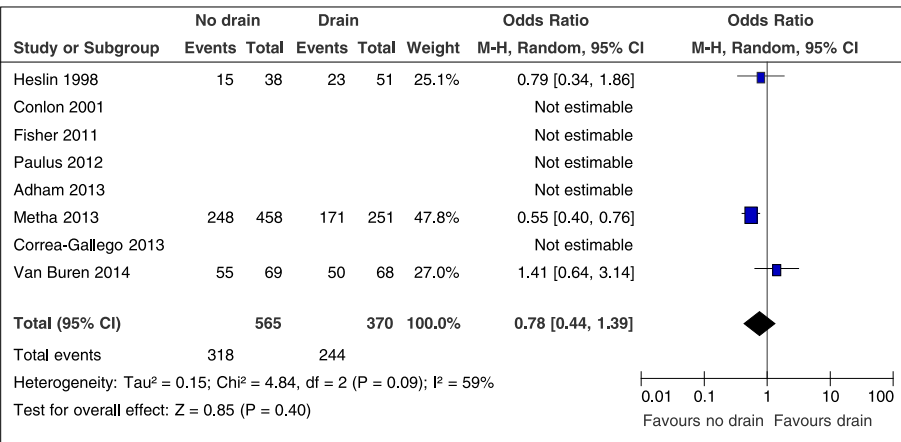

# Abscess (pancreaticoduodenectomy)

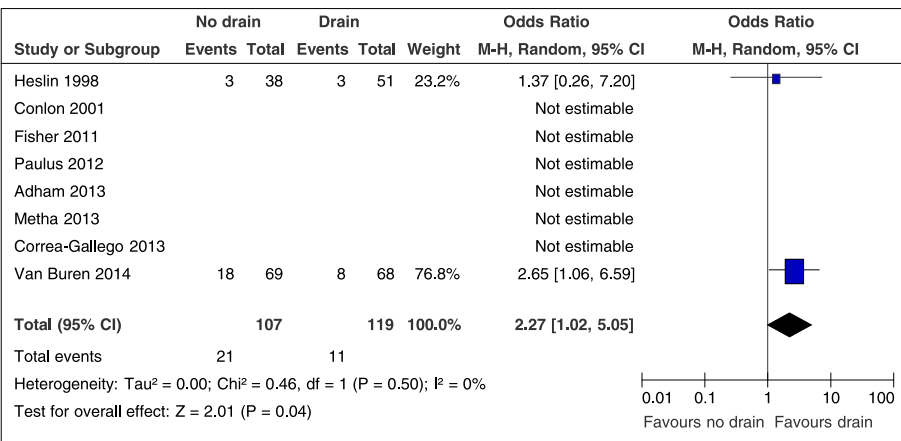

# Mortality (pancreaticoduodenectomy)

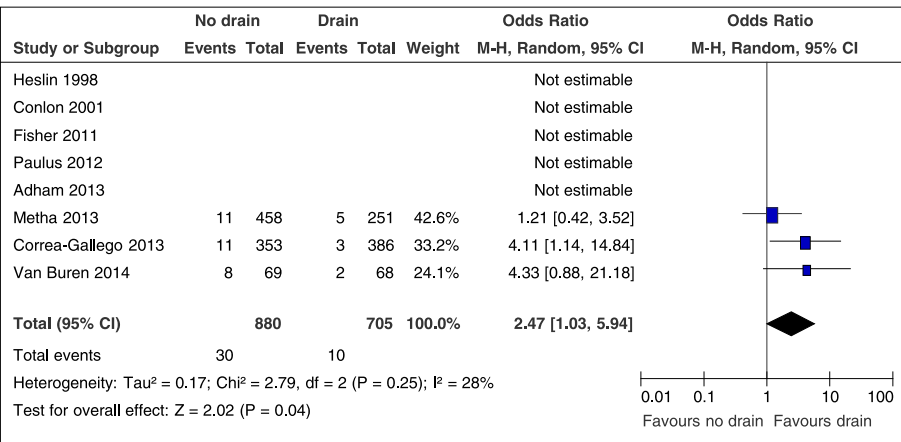

Supplement: MOESM6 [file 9512620]
